# Supplementary material
Source: PubMed Central journal article supplement (PMC4695218)
Supplement: NIHMS718729-supplement.pdf [file NIHMS718729-supplement.pdf]

Supplemental table: Protocol deviations at individual hospitals

| INSTINCT<br>Hospital<br>Assignment | JC<br>PSC | Total tPA<br>Treatments | Any<br>Deviation |         | Pre-<br>treatment<br>Deviation |         | Post-<br>treatment<br>Deviation |         |
|------------------------------------|-----------|-------------------------|------------------|---------|--------------------------------|---------|---------------------------------|---------|
|                                    |           |                         | N                | Percent | N                              | Percent | N                               | Percent |
| Intervention                       | No        | 6                       | 1                | 17%     | 0                              | 0%      | 1                               | 17%     |
| Intervention                       | No        | 31                      | 6                | 19%     | 1                              | 3%      | 5                               | 16%     |
| Control                            | No        | 5                       | 1                | 20%     | 0                              | 0%      | 1                               | 20%     |
| Control                            | No        | 14                      | 3                | 21%     | 0                              | 0%      | 3                               | 21%     |
| Control                            | No        | 18                      | 6                | 33%     | 0                              | 0%      | 6                               | 33%     |
| Control                            | Yes       | 18                      | 6                | 33%     | 2                              | 11%     | 6                               | 33%     |
| Control                            | Yes       | 95                      | 3                | 35%     | 1                              | 17%     | 2                               | 26%     |
|                                    |           |                         | 3                |         | 6                              |         | 5                               |         |
| Intervention                       | No        | 19                      | 7                | 37%     | 2                              | 11%     | 7                               | 37%     |
| Intervention                       | No        | 18                      | 7                | 39%     | 1                              | 6%      | 6                               | 33%     |
| Intervention                       | Yes       | 36                      | 1                | 39%     | 5                              | 14%     | 1                               | 36%     |
|                                    |           |                         | 4                |         |                                |         | 3                               |         |
| Intervention                       | No        | 58                      | 2                | 41%     | 1                              | 19%     | 2                               | 34%     |
|                                    |           |                         | 4                |         | 1                              |         | 0                               |         |
| Control                            | Yes       | 35                      | 1                | 43%     | 7                              | 20%     | 1                               | 34%     |
|                                    |           |                         | 5                |         |                                |         | 2                               |         |
| Control                            | No        | 9                       | 4                | 44%     | 2                              | 22%     | 4                               | 44%     |
| Intervention                       | No        | 22                      | 1                | 50%     | 2                              | 9%      | 1                               | 50%     |
|                                    |           |                         | 1                |         |                                |         | 1                               |         |
| Control                            | No        | 12                      | 6                | 50%     | 2                              | 17%     | 6                               | 50%     |
| Intervention                       | Yes       | 28                      | 1                | 50%     | 5                              | 18%     | 1                               | 43%     |
|                                    |           |                         | 4                |         |                                |         | 2                               |         |
| Intervention                       | No        | 20                      | 1                | 50%     | 6                              | 30%     | 7                               | 35%     |
|                                    |           |                         | 0                |         |                                |         |                                 |         |
| Control                            | Yes       | 26                      | 1                | 54%     | 8                              | 31%     | 1                               | 38%     |
|                                    |           |                         | 4                |         |                                |         | 0                               |         |
| Intervention                       | No        | 31                      | 1                | 55%     | 7                              | 23%     | 1                               | 42%     |
|                                    |           |                         | 7                |         |                                |         | 3                               |         |
| Control                            | No        | 7                       | 4                | 57%     | 2                              | 29%     | 4                               | 57%     |
| Intervention                       | Yes       | 14                      | 8                | 57%     | 2                              | 14%     | 7                               | 50%     |
| Control                            | No        | 13                      | 8                | 62%     | 4                              | 31%     | 6                               | 46%     |
| Intervention                       | Yes       | 19                      | 1                | 63%     | 4                              | 21%     | 8                               | 42%     |
|                                    |           |                         | 2                |         |                                |         |                                 |         |
| Control                            | No        | 3                       | 2                | 67%     | 1                              | 33%     | 2                               | 67%     |
